# Supplementary material for: Computational investigation on lipid bilayer disruption induced by amphiphilic Janus nanoparticles: combined effect of Janus balance and charged lipid concentration
Source: Royal Society of Chemistry journal article supplement (doi:10.1039/d3nr00403a), 2023-01-01
Supplement: d3nr00403a1.pdf [file d3nr00403a1.pdf]

Supporting Information for

**Computational investigation on lipid bilayer disruption induced by amphiphilic Janus nanoparticles: combined effect of Janus balance and charged lipid concentration**

Danh Nguyen<sup>1</sup>, James Wu<sup>2</sup>, Patrick Corrigan<sup>3</sup>, Ying Li<sup>1 \*</sup>

<sup>1</sup> Department of Mechanical Engineering, University of Wisconsin-Madison, Madison, WI 53706, USA.

<sup>2</sup> Department of Molecular and Cell Biology, University of California, Berkeley, CA 94720, USA.

<sup>3</sup> Department of Chemistry, University of Connecticut, Storrs, CT 06269, USA.

\*Correspondence: Email: [yli2562@wisc.edu](mailto:yli2562@wisc.edu); Phone: +1-608 265 0577; Fax: +1-608 890 3966

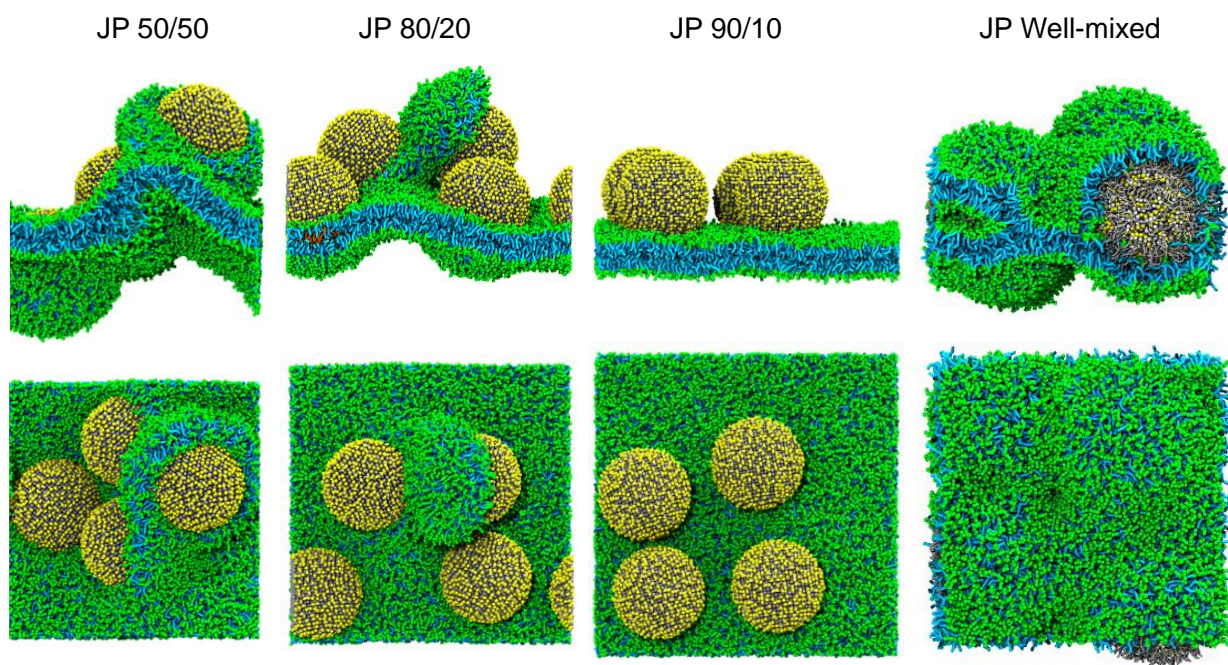

**Fig. S1** Multiple Janis NPs with different Janus NP's hydrophobicity interacting with pure DOPC membrane. Membrane's dimension is  $35 \times 35 \times 36 \text{ nm}^3$ . The Janus NP diameter is 10 nm. Solvent molecules are included in simulation but are not shown here for clarity.

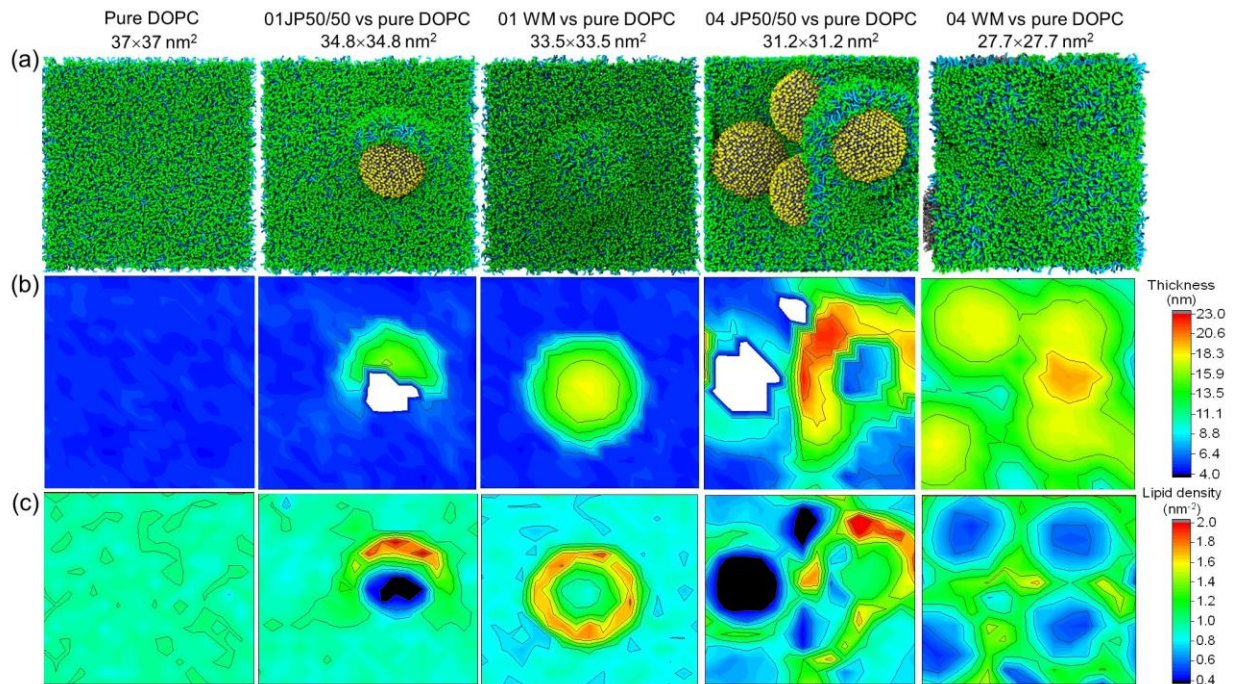

**Fig. S2** Comparing membrane disruption ability of JP 50/50 and WM. (a) MD simulation snapshots (top view) of NPs-membrane interactions. From left to right: pure DOPC membrane without NPs, pure DOPC membrane interacting with single JP 50/50 at 200 ns, with single WM NP at 200 ns, with four JP 50/50 at 500 ns and with four WM NPs at 500 ns. (b) Lipid bilayer thickness corresponds to the MD snapshots in (a). The white regions in cases of single JP 50/50 and four JP 50/50 indicating membrane defects (either no lipid heads in top leaflet or bottom leaflet). (c) Lipid density corresponds to the MD snapshots in (a).

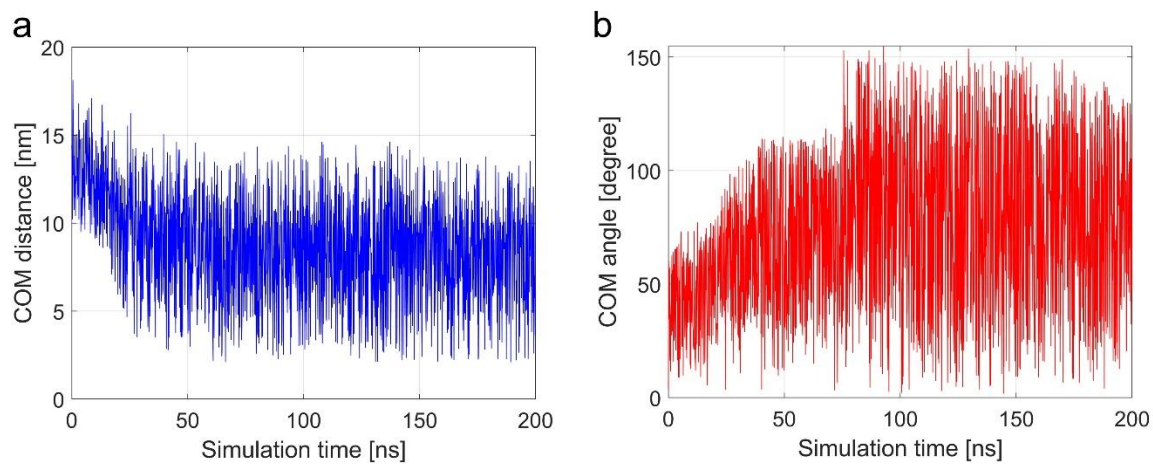

**Fig. S3** Collective variables spanning space including (a) COM distance and (b) COM angle during the metadynamics simulation for JP50/50 interacting with DOPC100 membrane.

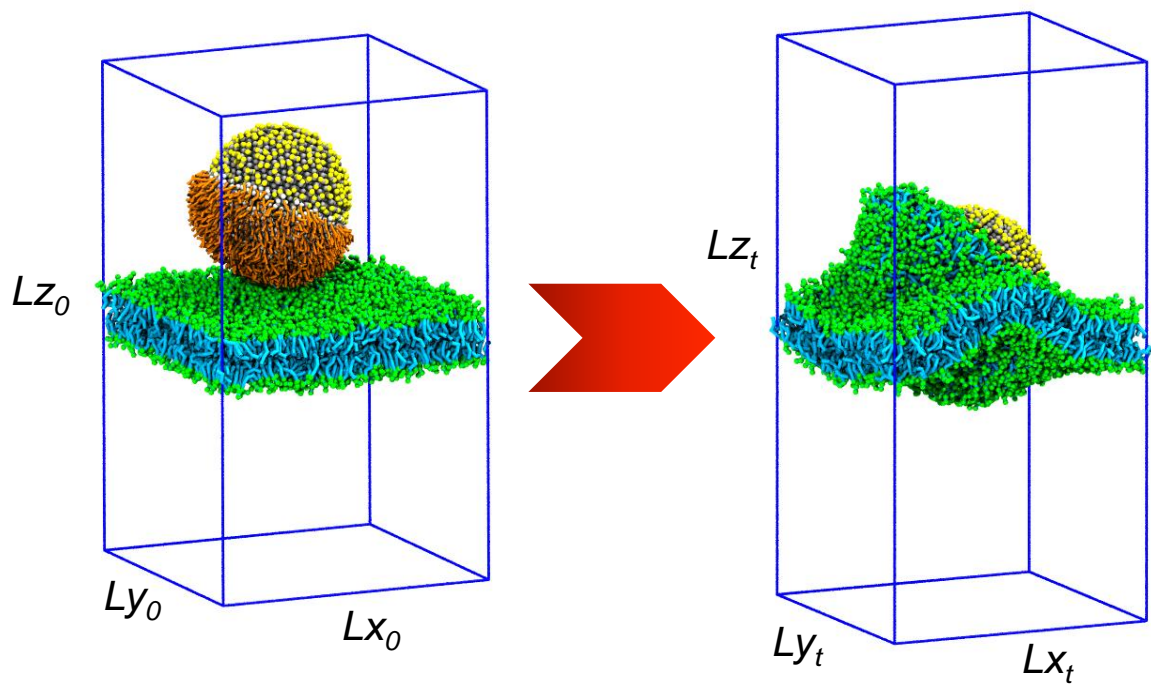

**Fig. S4** Calculation of reduction in membrane projection area induced by Janus NPs.  $Lx_0$ ,  $Ly_0$  and  $Lz_0$  are dimensions of the initial simulation box in  $x$ ,  $y$  and  $z$  directions, respectively. Similarly,  $Lx_t$ ,  $Ly_t$  and  $Lz_t$  are dimensions of the simulation box in  $x$ ,  $y$  and  $z$  directions at time  $t$ , respectively. The area reduction is calculated as  $\frac{A_t - A_0}{A_0} \times 100\%$ , where  $A_0 = Lx_0 \times Ly_0$  is the initial membrane area and  $A_t = Lx_t \times Ly_t$  is the membrane area at time  $t$ . Initial membrane dimension is  $\sim 22 \times 22$  nm<sup>2</sup>. The Janus NP diameter is 10 nm. Solvent molecules are included in simulation but are not shown here for clarity.

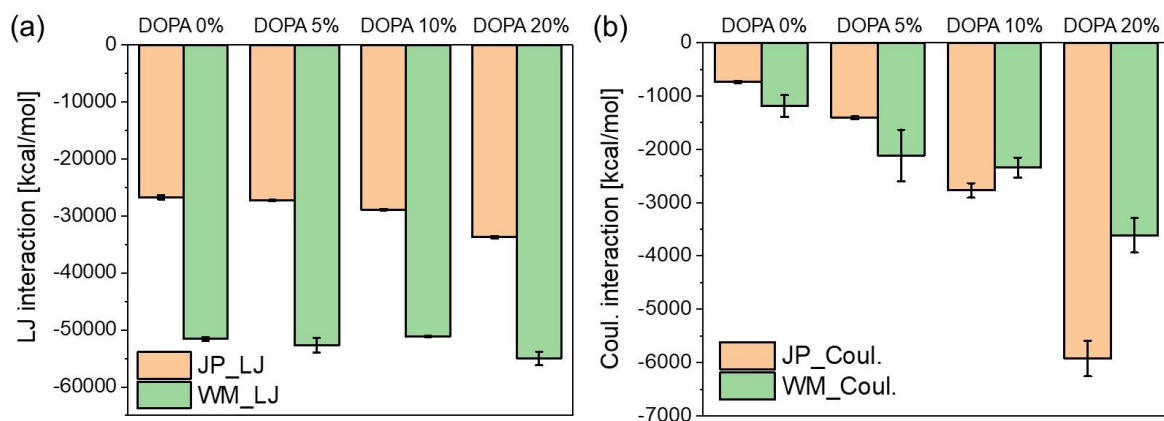

**Fig. S5** Comparing interaction with DOPA membranes between JP 50/50 and WM NP after 200 ns. (a) Average hydrophobic (LJ) and (b) electrostatic (Coulomb) interaction energy as a function of DOPA concentration from 0 to 20% molar concentration.

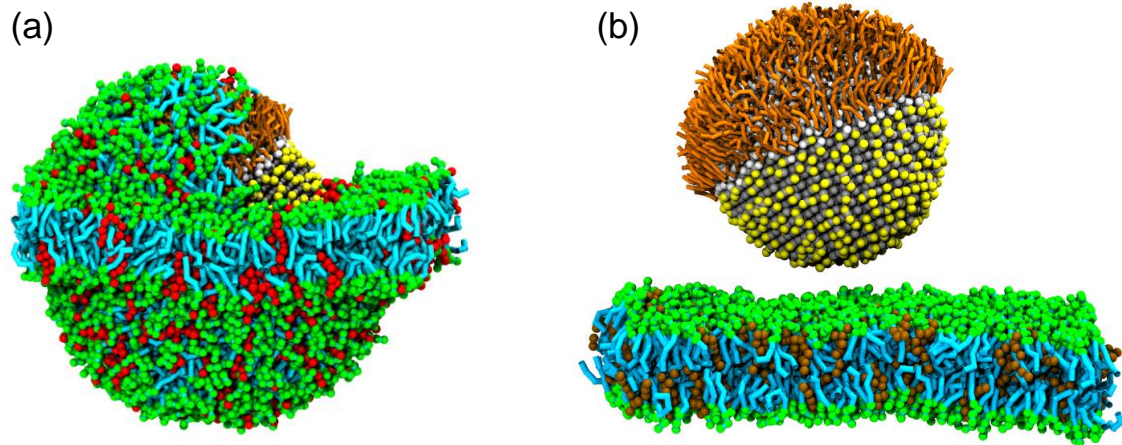

**Fig. S6** Positive hemisphere facing the membranes. (a) Negatively charged membrane (20% DOPA); (b) Positively charged membrane (20% DOTAP) after 100 ns MD simulations.

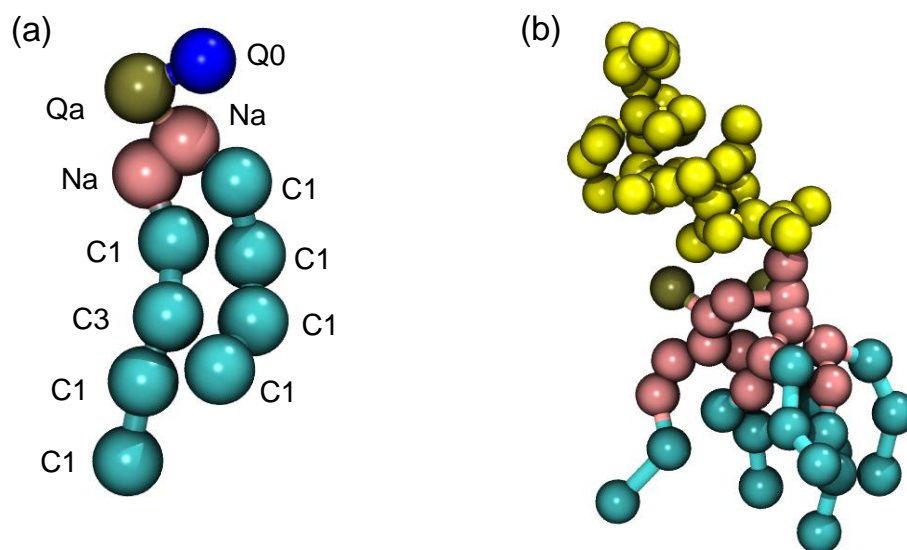

**Fig. S7** Coarse-grained representation for (a) POPC and (b) LPS. Details of LPS beads are in **Table S1**. For LPS, hydrocarbon tails are cyan, the lipid A head group is pink, phosphate groups are brown, and the remaining outer and inner core saccharides are yellow.

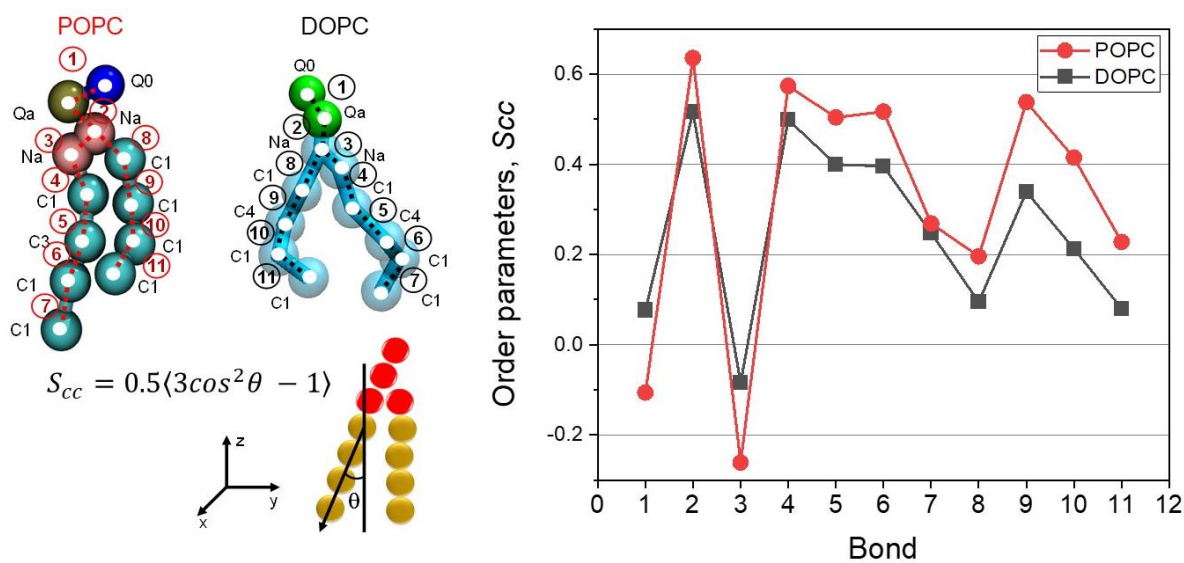

**Fig. S8** Average order parameters of the main lipids in LPS/POPC membrane (POPC) and DOPC lipids in pure DOPC membrane where POPC lipids show higher order parameters for the hydrophobic tails compared to that of DOPC lipids in the pure DOPC membrane.

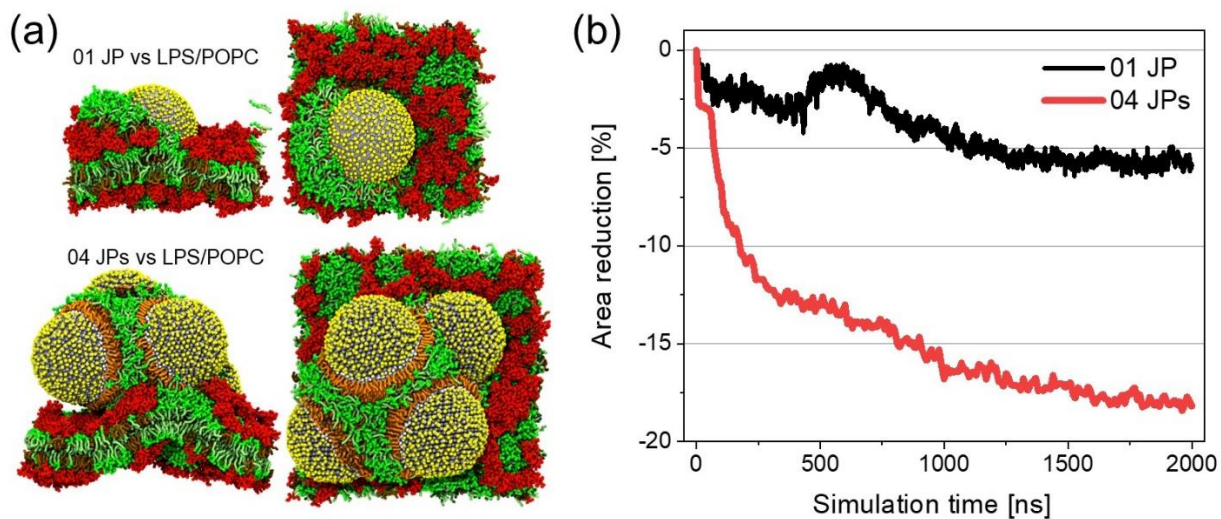

**Fig. S9** Comparing single JP with multiple JPs effect on LPS/POPC membrane disruptions. (a) Snapshots of MD simulations of 01 JP 50/50 and 04 JP 50/50 NPs interacting with 20% LPS/POPC membrane after 2  $\mu$ s. (b) Membrane area reduction induced by 01 JP 50/50 and 04 JP 50/50 NPs over the course of simulations. The membrane dimensions are  $23 \times 23 \text{ nm}^2$  and  $30 \times 30 \text{ nm}^2$  for interacting with 01 and 04 JP 50/50 NPs, respectively. Solvent molecules are included in the simulation but are not shown here for clarity.

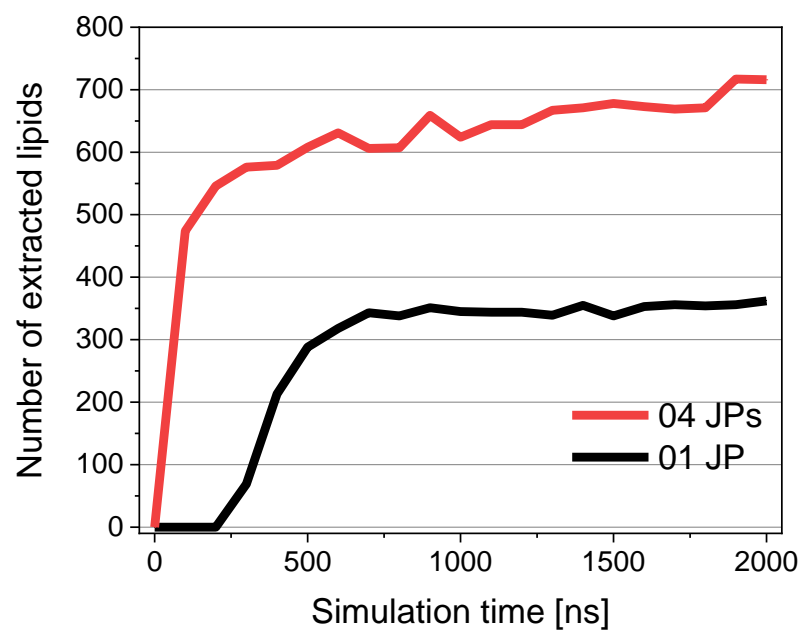

**Fig. S10** Number of extracted lipids induced by 01 and 04 JP 50/50 NPs over the course of simulations.

**Table S1** CG beads of LPS from CHARM-GUI.

| No. | Bead type | Bead name | Bead charge |
|-----|-----------|-----------|-------------|
| 1   | Qa        | PO1       | -2          |
| 2   | P2        | GM1       | 0           |
| 3   | Nda       | GM2       | 0           |
| 4   | P1        | GM3       | 0           |
| 5   | P2        | GM4       | 0           |
| 6   | P1        | GM5       | 0           |
| 7   | Nda       | GM6       | 0           |
| 8   | Qa        | PO2       | -2          |
| 9   | Na        | GL1       | 0           |
| 10  | Na        | GL2       | 0           |
| 11  | C1        | C1A       | 0           |
| 12  | C1        | C2A       | 0           |
| 13  | C1        | C3A       | 0           |
| 14  | C1        | C1B       | 0           |
| 15  | C1        | C2B       | 0           |
| 16  | C1        | C3B       | 0           |
| 17  | Na        | GL3       | 0           |
| 18  | Na        | GL4       | 0           |
| 19  | C1        | C1C       | 0           |
| 20  | C1        | C2C       | 0           |
| 21  | C1        | C3C       | 0           |
| 22  | C1        | C1D       | 0           |
| 23  | C1        | C2D       | 0           |
| 24  | C1        | C3D       | 0           |
| 25  | Na        | GL5       | 0           |
| 26  | Nda       | GL6       | 0           |
| 27  | C1        | C1E       | 0           |
| 28  | C1        | C2E       | 0           |

|    |     |     |    |
|----|-----|-----|----|
| 29 | Na  | GL7 | 0  |
| 30 | Nda | GL8 | 0  |
| 31 | C1  | C1F | 0  |
| 32 | C1  | C2F | 0  |
| 33 | Qa  | S01 | -1 |
| 34 | SC1 | S02 | 0  |
| 35 | SN0 | S03 | 0  |
| 36 | P2  | S04 | 0  |
| 37 | P4  | S05 | 0  |
| 38 | SC1 | S06 | 0  |
| 39 | P2  | S07 | 0  |
| 40 | SN0 | S08 | 0  |
| 41 | P4  | S09 | 0  |
| 42 | Qa  | S10 | -1 |
| 43 | SP1 | S11 | 0  |
| 44 | SN0 | S12 | 0  |
| 45 | P1  | S13 | 0  |
| 46 | P4  | S14 | 0  |
| 47 | Qa  | S15 | -2 |
| 48 | SP1 | S16 | 0  |
| 49 | SN0 | S17 | 0  |
| 50 | P2  | S18 | 0  |
| 51 | Qa  | S19 | -2 |
| 52 | SN0 | S20 | 0  |
| 53 | SC1 | S21 | 0  |
| 54 | SN0 | S22 | 0  |
| 55 | P2  | S23 | 0  |
| 56 | P4  | S24 | 0  |
| 57 | SP1 | S25 | 0  |
| 58 | P1  | S26 | 0  |

|    |     |     |   |
|----|-----|-----|---|
| 59 | P4  | S27 | 0 |
| 60 | SP1 | S28 | 0 |
| 61 | P1  | S29 | 0 |
| 62 | P4  | S30 | 0 |
| 63 | SP1 | S31 | 0 |
| 64 | P4  | S32 | 0 |
| 65 | P1  | S33 | 0 |
| 66 | SP1 | S34 | 0 |
| 67 | P1  | S35 | 0 |
| 68 | P4  | S36 | 0 |
| 69 | SP1 | S37 | 0 |
| 70 | P1  | S38 | 0 |
| 71 | P4  | S39 | 0 |
